# Supplementary material
Source: PubMed Central journal article supplement (PMC8366534)
Supplement: hcq-14-e007781-s001.pdf [file hcq-14-e007781-s001.pdf]

1 SUPPLEMENTAL MATERIAL

2 Supplemental Table I: Characteristics of patients included and excluded from the study

| Variables                   | Included (N = 75) | Excluded (N = 17) | P     |
|-----------------------------|-------------------|-------------------|-------|
| Age                         | 64 (58, 70)       | 61 (57, 67)       | 0.4   |
| Female                      | 18 (24%)          | 5 (29%)           | 0.8   |
| Hypertension                | 52 (69%)          | 13 (76%)          | 0.8   |
| Diabetes                    | 24 (32%)          | 4 (24%)           | 0.6   |
| Stroke                      | 4 (5.3%)          | 1 (5.9%)          | >0.9  |
| Chronic lung disease        | 12 (16%)          | 3 (18%)           | 0.6   |
| Peripheral vascular disease | 7 (9.3%)          | 2 (12%)           | 0.7   |
| Liver disease               | 4 (5.3%)          | 3 (18%)           | 0.11  |
| Dialysis                    | 2 (2.7%)          | 2 (12%)           | 0.2   |
| Prior cardiac surgery       | 5 (6.6%)          | 3 (18%)           | 0.3   |
| Myocardial infarction       | 22 (29%)          | 5 (29%)           | >0.9  |
| Heart failure               | 23 (31%)          | 8 (47%)           | 0.2   |
| Ejection fraction (%)       | 60 (55, 63)       | 63 (56, 68)       | 0.2   |
| Non-elective cases          | 22 (29%)          | 8 (47%)           | 0.2   |
| Any CABG                    | 38 (51%)          | 4 (24%)           | 0.043 |
| 30-day mortality            | 0 (0%)            | 0 (0%)            | >0.9  |

3 CABG = coronary artery bypass graft

4
